# Supplementary material for: Roles of Three HSF Domain-Containing Proteins in Mediating Heat-Shock Protein Genes and Sustaining Asexual Cycle, Stress Tolerance, and Virulence in Beauveria bassiana
Source: PubMed Central journal article supplement (PMC6068467; doi:10.3389/fmicb.2018.01677), 2018-07-25
Supplement: Presentation_1.pdf [file Presentation_1.pdf]

# Roles of Hsf1, Sfl1 and Skn7 in mediating heat-shock protein genes and sustaining asexual cycle, stress tolerance and virulence in *Beauveria bassiana*

Gang Zhou<sup>1,2,3</sup>, Sheng-Hua Ying<sup>3</sup>, Yue Hu<sup>3</sup>, Xiang Fang<sup>1\*</sup>, Ming-Guang Feng<sup>3\*</sup>, Jie Wang<sup>1,3\*</sup>

<sup>1</sup> College of Food Science, South China Agricultural University, Guangzhou, Guangdong, 510642, China (Corresponding at E-mail: wangjielangjing@126.com)

<sup>2</sup> Guangdong Open Laboratory of Applied Microbiology, Guangdong Provincial Key Laboratory of Microbial Culture Collection and Application, State Key Laboratory of Applied Microbiology Southern China, Guangdong Institute of Microbiology, Guangzhou, Guangdong, 510070, People's Republic of China

<sup>3</sup> Institute of Microbiology, College of Life Sciences, Zhejiang University, Hangzhou, Zhejiang, 310058, China

**Table S1.** Paired primers used for the manipulation of *hsf1*, *sfl1* and *skn7* in *B. bassiana*.

| Primer     | Paired sequences (5'–3')*                                                                                             | Purpose                                   |
|------------|-----------------------------------------------------------------------------------------------------------------------|-------------------------------------------|
| Hsf1up-F/R | AAAAAGAATTGCTGCGAGAGTCAAGAGAG / AAAAAAGCTTGTGTCGGTTGTGGGGTTAT                                                         | Cloning <i>hsf1</i> 5'-end (1045 bp)      |
| Hsf1dn-F/R | AAAAACTCGAGAGGAGGAGAGCGTGGAGAAG / AAAAACTAGTGGGGTTATGAACACCTCCAG                                                      | Cloning <i>hsf1</i> 3'-end (1072 bp)      |
| Sfl1up-F/R | AAAAAGAATTGCTAGATTGTAGCACAGACGGG / AAAAAGAGCTCACGAGGGTGAAGTGAATAAC                                                    | Cloning <i>sfl1</i> 5'-end (1583 bp)      |
| Sfl1dn-F/R | AAAAATCTAGAGCTCGGTCCCAAAGAAAACA / AAAAAAGATCTCGAATCTGGCTCTCAGGTGTAT                                                   | Cloning <i>sfl1</i> 3'-end (1432 bp)      |
| Skn7up-F/R | AAAAAGAATTGCTGCGACTGTGTTGTTGGC / AAAAAACCGGGGTTGACGACGGGGTGAAAAG                                                      | Cloning <i>skn7</i> 5'-end (2113 bp)      |
| Skn7dn-F/R | AAAAAAGATCTATGCCGTAAGTTGCGTCGTC / AAAAACTAGTCGTCGTTAGGCTGTCTGCTGT                                                     | Cloning <i>skn7</i> 3'-end (2298 bp)      |
| Hsf1fl-F/R | <u>GGGGACCACTTTGTACAAGAAAGCTGGGTGACCAGCGTCACGGCAAGAAT</u> / <u>GGGGACAAGTTTGTACAAAAAAGCAGGCTGGACTGAATGCGACAGGCGTT</u> | Cloning full-length <i>hsf1</i> (5390 bp) |
| Sfl1fl-F/R | <u>GGGGACCACTTTGTACAAGAAAGCTGGGTGGGGAGAGAACAGATTGGAC</u> / <u>GGGGACAAGTTTGTACAAAAAAGCAGGCTTCGTTGGACTACTCCTTTTC</u>   | Cloning full-length <i>sfl1</i> (4336 bp) |
| Skn7fl-F/R | <u>GGGGACCACTTTGTACAAGAAAGCTGGGTCTTAGCGATGTGAAGCAGGTT</u> / <u>GGGGACAAGTTTGTACAAAAAAGCAGGCTCAGAGCACCAACAAACAACAT</u> | Cloning full-length <i>skn7</i> (5811 bp) |
| pHsf1-F/R  | CAAGCACCTCACAACAACAAG / CTCACGCTTGGCTTTGGCT                                                                           | PCR detecting <i>hsf1</i>                 |
| pSfl1-F/R  | CACTACACTCGTCTTTACCGCCAG / TCGGGAGGCAGTTGAACAGGT                                                                      | PCR detecting <i>sfl1</i>                 |
| pSkn7-F/R  | TCGAACTCTTCTTCCCGCG / TGGTCTCTCCACAGCATT                                                                              | PCR detecting <i>skn7</i>                 |
| sbHsf1-F/R | TGTGACTCAAGGTGAAAAAAG / GAATATATTGTGGCAGTGGGT                                                                         | Southern probe for <i>hsf1</i>            |
| sbSfl1-F/R | GTAGGTAGGTATCACTTGCC / GCACCTGGAGAGAGAAAAAT                                                                           | Southern probe for <i>sfl1</i>            |
| sbSkn7-F/R | TTCTCCTCTCATTCCGTCTT / GACACCGAAGGAGGTTGACAG                                                                          | Southern probe for <i>skn7</i>            |
| qHsf1-F/R  | GTCCGATGAACCAAGTCTT/AAAGGAGTCCAGGGATCT                                                                                | qRT-PCR detecting <i>hsf1</i>             |
| qSfl1-F/R  | ATCCAGCATCTAATATCA/TAAAGTATTGGGAGAGAA                                                                                 | qRT-PCR detecting <i>sfl1</i>             |
| qSkn7-F/R  | GAACAATGCCAGTGAATT / CGACAACAACAAGGTAT                                                                                | qRT-PCR detecting <i>skn7</i>             |
| qActin-F/R | TCTCTACGGCAACATTGTC / TGCTGGAAGGTGGATAGG                                                                              | qRT-PCR detecting $\gamma$ -actin gene    |

\*Underlined regions denote the sites of restriction enzyme for the deletion of each target gene (*EcoRI/HindIII* and *XhoI/SpeI* for *hsf1*, *EcoRI/SacI* and *XbaI/BglII* for *sfl1*, and *EcoRI/XmaI* and *BglII/SpeI* for *skn7*) via homogenous recombination of 5' and 3' fragments separated by *bar* marker or the gateway exchange fragments for complementation of each target gene.

**Table S2.** Paired primers used for assessing transcript levels of 46 genes in the mutants of *hsf1*, *sfl1* and *skn7* versus *B. bassiana* wild-type via qRT-PCR.

| Gene ID                                           | Gene          | Annotation                                                     | Sequences (5'-3') of paired primers                |
|---------------------------------------------------|---------------|----------------------------------------------------------------|----------------------------------------------------|
| <b>Involved in growth and asexual development</b> |               |                                                                |                                                    |
| 19887954                                          | <i>fluG</i>   | developmental protein                                          | CCTCCCTAGTTTGGTCGCTTTCTC / CGCTGTCGGTAATCTGCTCCTC  |
| 19885980                                          | <i>flbA</i>   | developmental regulator                                        | CCAATCCACTCGCCGCTCTC / CGGAGGAAAAGAGAATCGGTAGAGG   |
| 19890000                                          | <i>flbB</i>   | bZIP transcription factor                                      | GCACTGACACGCCGACAAGAGC / CCGCCGCCGAAGCCTGTTG       |
| 19886193                                          | <i>flbC</i>   | C <sub>2</sub> H <sub>2</sub> conidiation transcription factor | TCCATCTCCAACCTGCTGGGTCTC / GGCGGCGTAGGCGGAAGG      |
| 19890271                                          | <i>flbD</i>   | MYB conidiophore development protein                           | CGGCAAGCGATGGGCAGAGATTG / ACGAGCAAGGTGACGGTAGAGGTG |
| 19889611                                          | <i>hyd1</i>   | hydrophobin 1                                                  | TTCTCAGCGATCTTGATCTT / GCACTTGTTCGATTGG            |
| 19886027                                          | <i>hyd2</i>   | hydrophobin 2                                                  | CATGGTGAAAGGATCTG / ATCTTGGTCGTCTTCTCG             |
| <b>Involved in Na<sup>+</sup> efflux</b>          |               |                                                                |                                                    |
| 19889202                                          | <i>Ena1</i>   | P-type Na <sup>+</sup> /K <sup>+</sup> ATPase 1                | TTCTACCGACGATAACT / TATTCTCAGCCAGGACAT             |
| 19892062                                          | <i>Ena2</i>   | P-type Na <sup>+</sup> /K <sup>+</sup> ATPase 2                | TAATACCAGGCAAGAAGT / TTAGGACGACAATGAGAG            |
| 19886191                                          | <i>Ena3</i>   | P-type Na <sup>+</sup> /K <sup>+</sup> ATPase 3                | GAATCTCAGCAGACTCAT / AATCACGAATCTTCTCT             |
| 19887969                                          | <i>Ena4</i>   | P-type Na <sup>+</sup> /K <sup>+</sup> ATPase 4                | CGATGATGACAGCAAGTT / CGATAGAGCACCACAGAT            |
| 19890673                                          | <i>Ena5</i>   | P-type Na <sup>+</sup> /K <sup>+</sup> ATPase 5                | CAAGGATACAAGCGGTAA / CGACGAAGTAATGAGGTT            |
| <b>HSP-coding genes</b>                           |               |                                                                |                                                    |
| 19890898                                          | <i>hsp20</i>  | heat shock protein 20                                          | TCAGGAGATGAGAAGAAC / GCTGTGATGATGTTTGT             |
| 19891700                                          | <i>hsp30a</i> | heat shock protein 30                                          | TCTCCCTTGGTCGTGAT/GTATTGGTCGCTGCTCTC               |
| 19885069                                          | <i>hsp30b</i> | heat shock protein 30                                          | ATGGCTTCTTCTTCC/AGTATGTGTCAAACGTC                  |
| 19886748                                          | <i>hsp40a</i> | heat shock protein 40                                          | GAGATTGACCTCTATGAG / CTCCTGAATTTGACCTC             |
| 19891452                                          | <i>hsp40b</i> | heat shock protein 40                                          | AGAAGACTACTACAAGATCC / TTCCTGGCAGTATCATC           |
| 19889942                                          | <i>hsp40c</i> | heat shock protein 40                                          | ATTTACACGACGAACAAG / TCGGAGTCCATAGTAAGC            |
| 19888317                                          | <i>hsp40d</i> | heat shock protein 40                                          | CAGGTACTTTCCGACAAG / CGAAAATAGACGAGAAGAAC          |
| 19885590                                          | <i>hsp40e</i> | heat shock protein 40                                          | GACAAGAACAAGGACGAT / ACCTCTCAGCAGAAAATTC           |
| 19883188                                          | <i>hsp40f</i> | heat shock protein 40                                          | AATCGGTGCTCTAAGTT / TGTCGAAAGAATTCGTAAG            |
| 19888479                                          | <i>hsp60a</i> | heat shock protein 60                                          | TTTACATCTTCACTACGA/CCTTCTAATCAGTTCT                |
| 19892463                                          | <i>hsp70a</i> | heat shock protein 70                                          | GTGGTAAAGGCATGATTT / GAGTCAGAAGTTGGAAG             |
| 19889799                                          | <i>hsp70b</i> | heat shock protein 70                                          | GGACCTATGGCTCAACAG / AATGCGACACCAGAAAAG            |
| 19891640                                          | <i>hsp70c</i> | heat shock protein 70                                          | TTGGCTCAGTTGAATGTG / GCAAGTCTGAAAGCAATA            |
| 19892721                                          | <i>hsp70d</i> | heat shock protein 70                                          | TCTTGTAGCCGTTGATT / GGTATTATCTCCTCTTAC             |
| 19884009                                          | <i>hsp70e</i> | heat shock protein 70                                          | AGCAGAAGCAATGTCAAT/TGGCTGATGAAGAAGTTG              |
| 19886620                                          | <i>hsp70f</i> | heat shock protein 70                                          | AGCCGTCTTCTTCTCT/GCCTTGATGTACTCTGTG                |
| 19883269                                          | <i>hsp70g</i> | heat shock protein 70                                          | CATGGTTCTCCTCAAGAT / CTGGTTGCTGTTGAAGTA            |
| 19888598                                          | <i>hsp70h</i> | heat shock protein 70                                          | TGCTGGTGGTATGATGAC / TCGGAGAAGGTAGAGAAGA           |
| 19886917                                          | <i>hsp70i</i> | heat shock protein 70                                          | ATTATGGCACTGTCAATG / TGATACGGTTTCTTGAT             |
| 19885360                                          | <i>hsp70j</i> | heat shock protein 70                                          | ACATCAAGGTCACTAAGC / CTTCTCTCGTCTTCGTC             |
| 19889859                                          | <i>hsp70k</i> | heat shock protein 70                                          | TCAACATTCACGGCATTTC / CTTCTGTGCAAGTCCAT            |
| 19884520                                          | <i>hsp70l</i> | heat shock protein 70                                          | TCTGTCCTTAAACGATACC / TCACGAAGAGCAGTAATC           |
| 19883953                                          | <i>hsp70m</i> | heat shock protein 70                                          | ACTTACTTCAATATGGC / TAGGTACTTCTCTCAAG              |
| 19886284                                          | <i>hsp70n</i> | heat shock protein 70                                          | CATTGTTGTCTATTGACT / TCTCCTGATCTCCACTA             |
| 19883808                                          | <i>hsp70o</i> | heat shock protein 70                                          | TACAATCTGACTGAAGAACATATC / ATCGTTGAGCCTGACATT      |
| 19889528                                          | <i>hsp90</i>  | heat shock protein 90                                          | TTCTCTCCCTCATCATCAAC/CTTGTAGCGGACCTTGTC            |
| 19885295                                          | <i>hsp104</i> | heat shock protein 104                                         | CTTTCGCCACAATTTAC/ACACCGATGTAGGTATCTT              |
| 19884587                                          | <i>hsp78</i>  | heat shock protein 78                                          | ATACAGACCTGCCGCTAT/TATGTTGCTGTGACCATTTG            |

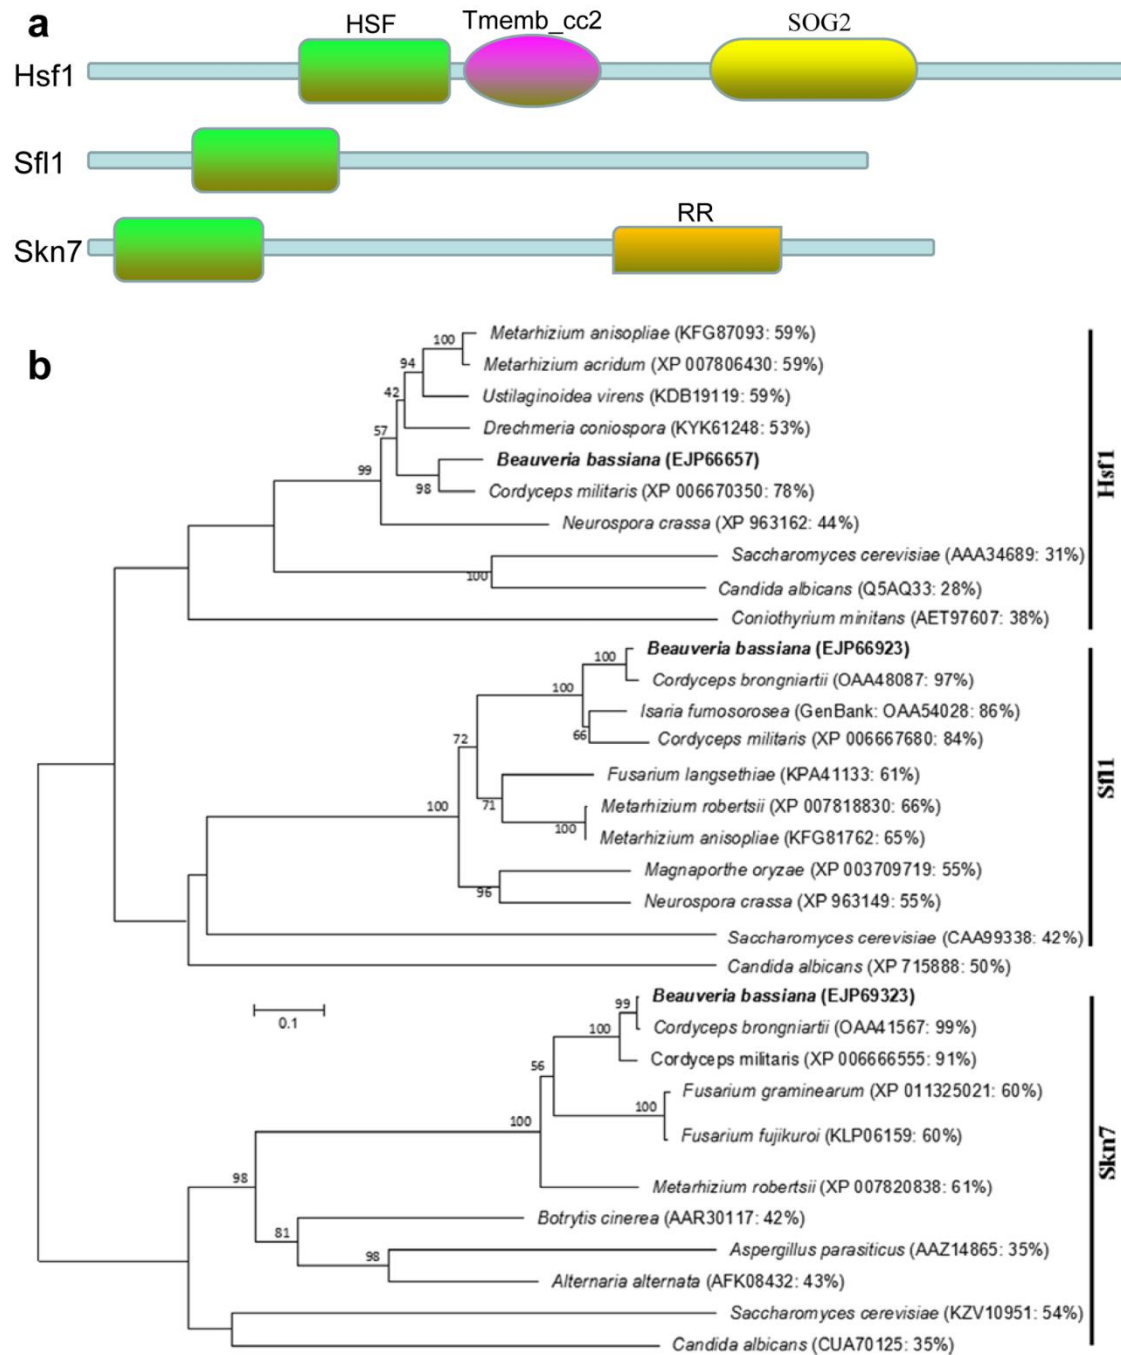

**Fig. S1.** Structural and phylogenetic features of three HSF-containing genes found in the genome database of *B. bassiana*. **(a)** Conserved domains predicted from three HSFs via sequence alignment and online blast analysis at <http://blast.ncbi.nlm.nih.gov/blast.cgi>. **(b)** Phylogenetic tree for three HSFs of *B. bassiana* and other fungi based on a neighbor-joining method in MEGA7 at <http://www.megasoftware.net>. The NCBI accession code of a given protein and its sequence identity to that of *B. bassiana* are given in the parentheses following each fungal name. Scale bar: branch length proportional to genetic distance.

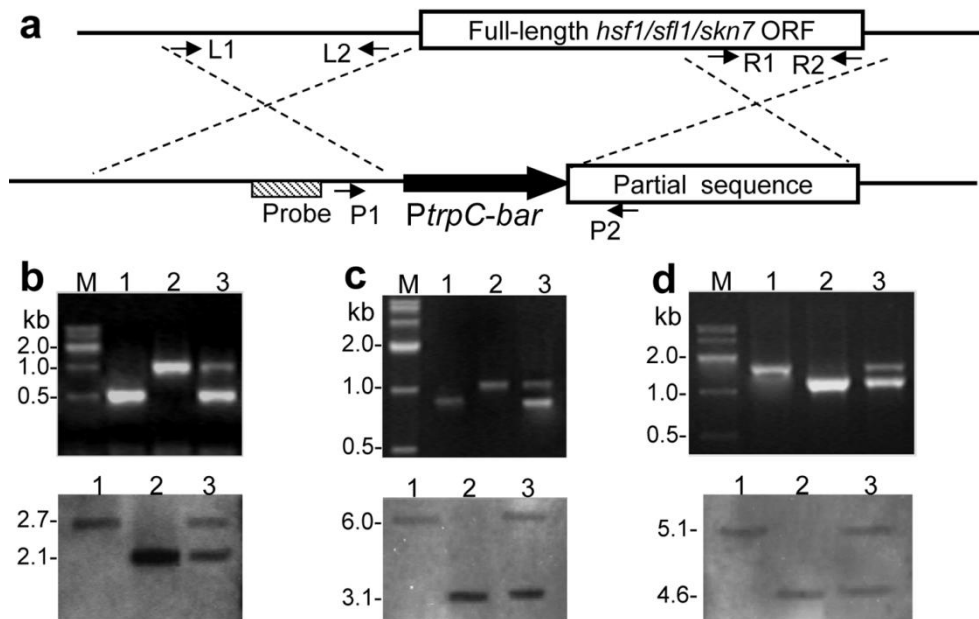

**Fig. S2.** Construction and identification of *B. bassiana* *hsf1*, *sfl1* and *skn7* mutants. **(a)** Schematic diagram for the deletion strategy of each target gene. **(b–d)** The *hsf1*, *sfl1* and *skn7* mutants identified via PCR (*upper panel*) and Southern blot hybridization (*lower panel*), respectively. *Lane 1*: wild-type strain. *Lane 2*: deletion mutant. *Lane 3*: complemented mutant. Genomic DNAs used for Southern blotting of *hsf1*, *sfl1* and *skn7* were digested with *XhoI/XhoI*, *XbaI/XbaI* and *BstXI/EcoRI*, respectively.

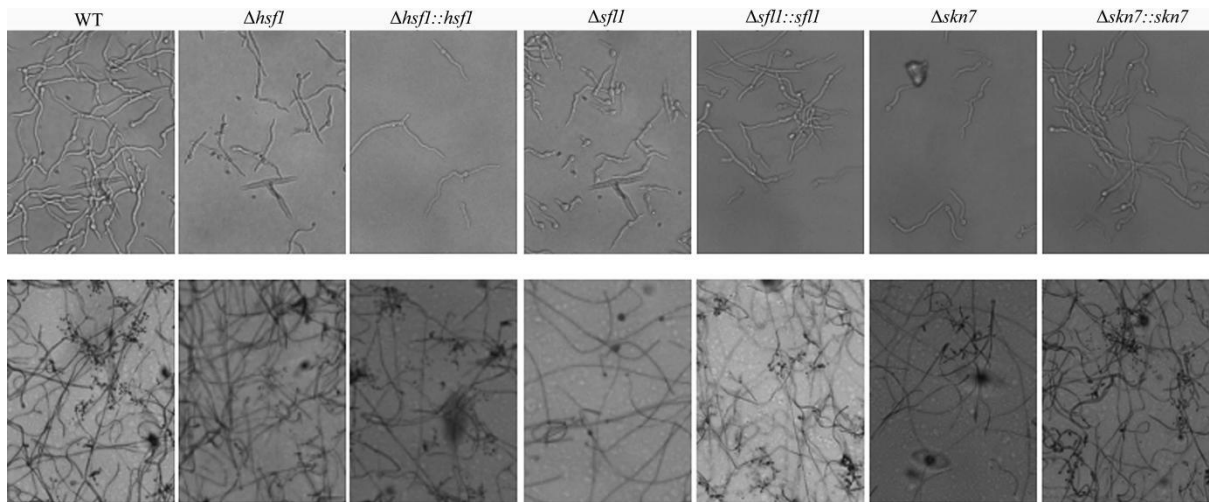

**Fig. S3.** Images of germ tubes and early hyphae after conidia were cultivated on GM plates for 16 h (up) and conidiophores and conidia after conidia were cultivated on SDAY plates for 3 days (down), visualized at 400× magnification.

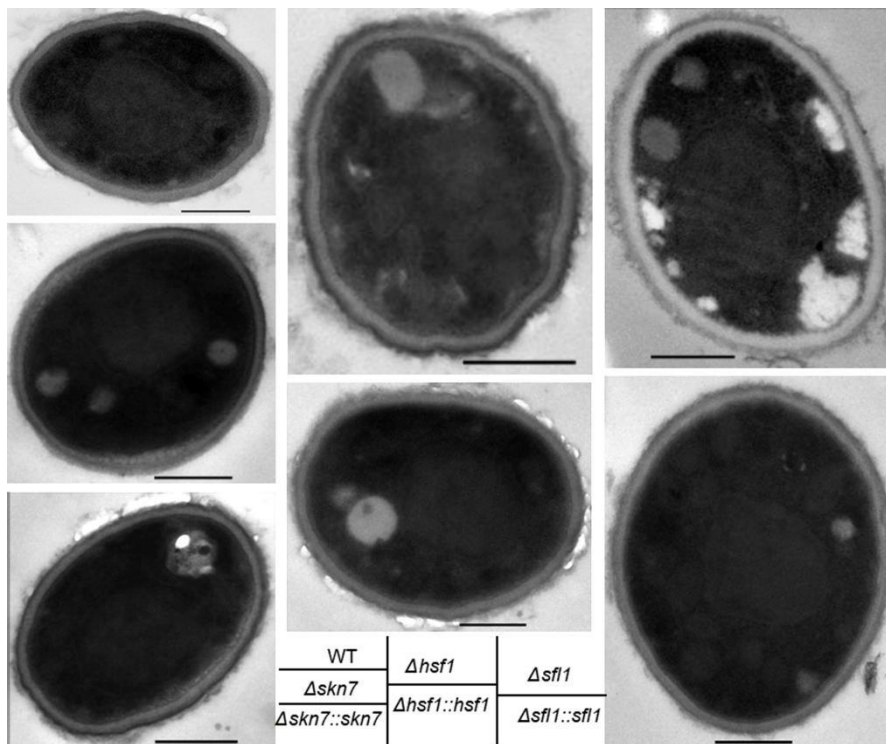

**Fig. S4.** Images for the ultrathin sections of conidia observed under transmission electron microscopy (TEM). Briefly, aerial conidia were washed three times in PBS (pH 7.0) and fixed overnight at 4 °C with 2% paraformaldehyde and 2.5% (v/v) glutaraldehyde in 0.1 M phosphate buffer (pH 7.2). After post-fixed in 1% OsO<sub>4</sub>, conidia were dehydrated in a graded ethanol series, embedded in Spurr resin and stained with 2% uranyl acetate and Reynold's lead solution. The samples were examined under an H-7650 transmission electron microscope (Hitachi). Scale: 0.5 μm.

**Table S3.** Relative transcript levels of HSPs gene in the 3-d-old SDAY cultures of *hsf1*, *sfl1* and *skn7* mutants versus WT grown at 25°C or then shocked at 40°C for 1 h.

| HSP genes     | Relative transcript levels (mean ± SD) in normal cultures* |               |                     |               |                     |               |                     | Relative transcript levels (mean ± SD) in heat-shocked cultures* |               |                     |               |                     |               |                     |
|---------------|------------------------------------------------------------|---------------|---------------------|---------------|---------------------|---------------|---------------------|------------------------------------------------------------------|---------------|---------------------|---------------|---------------------|---------------|---------------------|
|               | WT                                                         | $\Delta hsf1$ | $\Delta hsf1::hsf1$ | $\Delta sfl1$ | $\Delta sfl1::sfl1$ | $\Delta skn7$ | $\Delta skn7::skn7$ | WT                                                               | $\Delta hsf1$ | $\Delta hsf1::hsf1$ | $\Delta sfl1$ | $\Delta sfl1::sfl1$ | $\Delta skn7$ | $\Delta skn7::skn7$ |
| <i>hsp20</i>  | 1.00±0.09                                                  | 13.5±0.97     | 1.71±0.35           | 1.38±0.11     | 1.02±0.08           | 0.24±0.01     | 0.97±0.02           | 1.00±0.07                                                        | 2.14±0.03     | 1.00±0.02           | 0.11±0.02     | 0.95±0.04           | 0.47±0.03     | 1.00±0.02           |
| <i>hsp30a</i> | 1.00±0.09                                                  | 1.25±0.14     | 0.97±0.13           | 0.83±0.02     | 1.00±0.02           | 0.58±0.01     | 1.00±0.01           | 1.00±0.03                                                        | 0.10±0.01     | 0.95±0.03           | 0.78±0.02     | 0.97±0.04           | 0.54±0.02     | 0.95±0.03           |
| <i>hsp30b</i> | 1.00±0.11                                                  | 1.50±0.10     | 1.02±0.06           | 0.23±0.02     | 0.96±0.02           | 0.25±0.01     | 0.96±0.03           | 1.03±0.31                                                        | 0.43±0.04     | 1.00±0.03           | 0.09±0.01     | 0.93±0.06           | 0.94±0.02     | 1.00±0.02           |
| <i>hsp40a</i> | 1.00±0.06                                                  | 0.17±0.01     | 1.00±0.01           | 1.03±0.06     | 1.02±0.06           | 0.62±0.03     | 0.93±0.04           | 1.04±0.39                                                        | 0.54±0.03     | 1.00±0.02           | 0.79±0.04     | 1.00±0.03           | 3.34±0.33     | 1.35±0.39           |
| <i>hsp40b</i> | 1.00±0.10                                                  | 0.10±0.00     | 0.95±0.04           | 1.33±0.02     | 1.01±0.02           | 0.45±0.02     | 0.96±0.04           | 1.01±0.14                                                        | 1.21±0.04     | 1.00±0.03           | 0.17±0.04     | 0.95±0.03           | 1.14±0.07     | 1.00±0.05           |
| <i>hsp40c</i> | 1.00±0.06                                                  | 6.30±0.31     | 1.63±0.35           | 1.09±0.02     | 0.99±0.02           | 0.24±0.01     | 0.99±0.01           | 1.00±0.02                                                        | 0.30±0.01     | 1.00±0.01           | 0.61±0.05     | 1.00±0.03           | 0.14±0.01     | 0.93±0.10           |
| <i>hsp40d</i> | 1.01±0.13                                                  | 7.45±0.67     | 1.71±0.47           | 1.03±0.07     | 1.02±0.06           | 0.19±0.01     | 0.95±0.04           | 1.00±0.12                                                        | 1.07±0.02     | 1.00±0.01           | 0.14±0.01     | 0.99±0.01           | 0.07±0.00     | 0.87±0.01           |
| <i>hsp40e</i> | 1.01±0.14                                                  | 8.99±0.90     | 1.74±0.18           | 1.57±0.17     | 1.11±0.02           | 0.20±0.02     | 0.95±0.04           | 1.00±0.04                                                        | 0.84±0.03     | 1.00±0.02           | 0.21±0.00     | 1.00±0.00           | 0.12±0.00     | 0.84±0.03           |
| <i>hsp40f</i> | 1.00±0.12                                                  | 5.53±0.12     | 1.67±0.50           | 0.95±0.02     | 1.00±0.02           | 0.28±0.00     | 0.97±0.03           | 1.00±0.08                                                        | 0.49±0.04     | 0.97±0.03           | 0.24±0.01     | 1.00±0.01           | 0.18±0.00     | 1.00±0.00           |
| <i>hsp60</i>  | 1.00±0.10                                                  | 35.9±11.7     | 0.97±0.05           | 0.68±0.14     | 1.00±0.11           | 0.42±0.10     | 0.96±0.21           | 1.00±0.12                                                        | 2.13±0.22     | 1.14±0.10           | 0.50±0.09     | 0.93±0.01           | 1.07±0.25     | 1.01±0.17           |
| <i>hsp70a</i> | 1.00±0.09                                                  | 0.77±0.05     | 1.00±0.03           | 1.68±0.11     | 0.98±0.11           | 0.77±0.05     | 1.10±0.18           | 1.00±0.06                                                        | 0.06±0.00     | 0.96±0.04           | 0.07±0.00     | 1.00±0.00           | 2.19±0.02     | 1.00±0.01           |
| <i>hsp70b</i> | 1.00±0.05                                                  | 0.11±0.01     | 0.95±0.07           | 0.29±0.02     | 0.94±0.04           | 2.60±0.08     | 1.02±0.07           | 1.00±0.06                                                        | 2.43±0.07     | 1.00±0.05           | 0.14±0.01     | 0.85±0.04           | 0.06±0.01     | 0.87±0.02           |
| <i>hsp70c</i> | 1.00±0.03                                                  | 15.7±1.10     | 1.96±0.37           | 2.28±0.13     | 0.98±0.12           | 0.17±0.01     | 0.90±0.00           | 1.00±0.03                                                        | 1.42±0.03     | 1.00±0.02           | 0.09±0.01     | 0.87±0.02           | 0.06±0.01     | 0.83±0.01           |
| <i>hsp70d</i> | 1.01±0.14                                                  | 17.4±0.83     | 1.84±0.07           | 1.74±0.14     | 1.02±0.09           | 0.74±0.03     | 1.01±0.02           | 1.00±0.05                                                        | 1.82±0.01     | 1.00±0.01           | 0.07±0.00     | 0.95±0.05           | 0.06±0.01     | 0.85±0.03           |
| <i>hsp70e</i> | 1.00±0.10                                                  | 0.92±0.02     | 1.00±0.02           | 0.16±0.00     | 0.97±0.06           | 0.20±0.01     | 0.94±0.06           | 1.09±0.50                                                        | 0.83±0.08     | 1.00±0.05           | 0.13±0.01     | 0.90±0.01           | 0.34±0.06     | 1.00±0.04           |
| <i>hsp70f</i> | 1.00±0.10                                                  | 0.90±0.03     | 1.00±0.03           | 0.16±0.01     | 0.94±0.05           | 0.15±0.00     | 0.94±0.05           | 1.00±0.04                                                        | 0.91±0.04     | 1.00±0.03           | 0.12±0.01     | 0.90±0.00           | 0.06±0.00     | 0.95±0.04           |
| <i>hsp70g</i> | 1.00±0.08                                                  | 0.06±0.00     | 1.00±0.00           | 0.51±0.06     | 0.95±0.02           | 2.82±0.04     | 0.99±0.03           | 1.00±0.08                                                        | 2.32±0.08     | 1.00±0.06           | 0.09±0.01     | 0.88±0.03           | 1.38±0.14     | 1.03±0.06           |
| <i>hsp70h</i> | 1.00±0.07                                                  | 0.59±0.07     | 0.95±0.00           | 0.33±0.03     | 1.00±0.02           | 2.60±0.08     | 0.98±0.06           | 1.00±0.02                                                        | 0.53±0.03     | 1.00±0.02           | 0.48±0.01     | 1.00±0.00           | 0.45±0.07     | 1.00±0.05           |
| <i>hsp70i</i> | 1.00±0.03                                                  | 0.47±0.01     | 1.00±0.01           | 0.12±0.01     | 0.96±0.04           | 2.78±0.22     | 0.98±0.02           | 1.00±0.06                                                        | 1.22±0.03     | 1.00±0.02           | 0.17±0.01     | 0.98±0.02           | 0.52±0.04     | 1.00±0.03           |
| <i>hsp70j</i> | 1.00±0.06                                                  | 4.82±0.24     | 1.62±0.36           | 2.01±0.03     | 0.99±0.03           | 0.44±0.01     | 0.96±0.02           | 1.00±0.05                                                        | 1.84±0.17     | 1.00±0.12           | 0.12±0.01     | 0.90±0.01           | 0.07±0.00     | 0.87±0.02           |
| <i>hsp70k</i> | 1.00±0.06                                                  | 4.17±0.23     | 1.03±0.15           | 1.31±0.11     | 0.98±0.11           | 2.30±0.11     | 1.03±0.11           | 1.00±0.08                                                        | 0.81±0.04     | 1.00±0.03           | 0.52±0.02     | 1.00±0.01           | 0.42±0.04     | 1.00±0.03           |
| <i>hsp70l</i> | 1.00±0.11                                                  | 0.46±0.09     | 0.96±0.01           | 0.15±0.03     | 0.84±0.03           | 2.39±0.08     | 1.02±0.08           | 1.00±0.09                                                        | 1.48±0.04     | 1.00±0.03           | 0.43±0.03     | 1.00±0.02           | 0.74±0.09     | 1.01±0.16           |
| <i>hsp70m</i> | 1.00±0.10                                                  | 17.7±0.71     | 1.71±0.36           | 1.41±0.12     | 1.09±0.06           | 0.11±0.01     | 0.97±0.05           | 1.00±0.04                                                        | 1.01±0.00     | 1.00±0.00           | 0.06±0.00     | 0.87±0.04           | 0.06±0.00     | 1.00±0.00           |
| <i>hsp70n</i> | 1.00±0.01                                                  | 15.4±0.75     | 1.70±0.19           | 1.07±0.04     | 1.01±0.04           | 0.38±0.04     | 0.94±0.02           | 1.00±0.07                                                        | 0.71±0.03     | 1.00±0.02           | 0.03±0.00     | 0.86±0.03           | 0.92±0.01     | 1.00±0.01           |
| <i>hsp70o</i> | 1.01±0.15                                                  | 14.1±0.78     | 1.69±0.12           | 1.37±0.08     | 1.02±0.06           | 0.12±0.00     | 0.98±0.04           | 1.00±0.05                                                        | 0.98±0.05     | 1.00±0.04           | 0.06±0.00     | 0.84±0.03           | 0.05±0.00     | 0.94±0.07           |
| <i>hsp90</i>  | 1.00±0.02                                                  | 0.75±0.02     | 1.01±0.02           | 0.33±0.01     | 0.99±0.02           | 0.54±0.01     | 1.00±0.00           | 1.00±0.07                                                        | 0.23±0.02     | 1.00±0.01           | 0.48±0.04     | 0.97±0.03           | 1.06±0.04     | 1.00±0.02           |
| <i>hsp104</i> | 1.00±0.04                                                  | 2.73±0.21     | 0.98±0.12           | 0.63±0.02     | 1.00±0.02           | 0.36±0.00     | 1.00±0.00           | 1.00±0.09                                                        | 0.42±0.05     | 1.00±0.04           | 3.61±0.39     | 1.46±0.09           | 0.57±0.04     | 1.00±0.03           |
| <i>hsp78</i>  | 1.00±0.00                                                  | 0.93±0.00     | 1.00±0.00           | 0.15±0.00     | 0.90±0.00           | 0.20±0.01     | 0.80±0.01           | 1.00±0.08                                                        | 0.66±0.01     | 1.00±0.01           | 0.63±0.03     | 0.97±0.03           | 3.71±0.86     | 1.44±0.13           |

\* Red: HSP genes significantly upregulated by  $\geq 2$ -fold. Green: HSP genes significantly downregulated by  $\geq 50\%$ .
